# Supplementary material
Source: MDPI journal article supplement (https://www.mdpi.com/2076-3263/12/4/148)
Supplement: s1 [file s1]

---

# Supplementary Materials: Atmospheric $p\text{CO}_2$ Reconstruction of Early Cretaceous Terrestrial Deposits in Texas and Oklahoma Using Pedogenic Carbonate and Occluded Organic Matter

Kate Andrzejewski <sup>1,\*</sup>, Neil Tabor <sup>2</sup>, Dale Winkler <sup>2</sup> and Timothy Myers <sup>3</sup>

**Table S1.** Paleosol carbonate stable isotopic values of measured  $\delta^{13}\text{C}$  of calcite ( $\delta^{13}\text{C}_{\text{carb}}$  ‰ VPDB), measured  $\delta^{18}\text{O}$  of calcite ( $\delta^{18}\text{O}_{\text{carb}}$  ‰ VPDB), measured  $\delta^{13}\text{C}$  of acid-treated residues containing occluded organic matter ( $\delta^{13}\text{C}_{\text{oom}}$  ‰ VPDB), differences between paired calcite and co-existing occluded organic matter ( $\Delta^{13}\text{C}_{\text{cc-om}}$ ), weight percent carbon of organic matter residue, and estimated  $\delta^{13}\text{C}$  of soil-respired  $\text{CO}_2$  at the time of calcite crystallization ( $\delta^{13}\text{C}_s$ ) based on the measured values of the occluded organic matter corrected for diffusion enrichment assuming a soil temperature of  $30^\circ\text{C}$  ( $\delta^{13}\text{C}_s$  ‰ VPDB,  $30^\circ\text{C}$ ). Replicate analyses are marked with “R”.

| Location        | Sample     | Formation (Age) | $\delta^{13}\text{C}_{\text{carb}}$ (‰ VPDB) | $\delta^{18}\text{O}_{\text{carb}}$ (‰ VPDB) | $\delta^{13}\text{C}_{\text{oom}}$ (‰ VPDB) | $\Delta^{13}\text{C}_{\text{cc-om}}$ (‰) | Weight (%) or-<br>ganic carbon resi-<br>due | $\delta^{13}\text{C}_s$ (‰ VPDB, $30^\circ\text{C}$ ) |
|-----------------|------------|-----------------|----------------------------------------------|----------------------------------------------|---------------------------------------------|------------------------------------------|---------------------------------------------|-------------------------------------------------------|
| Oklahoma        | Cross-C-10 | Antlers         | -10.84                                       | -5.81                                        | -25.22                                      | 14.38                                    | 0.67                                        | -12.55                                                |
|                 | Cross C-9  | (Albian)        | -10.93                                       | -5.60                                        | -25.87                                      | 14.94                                    | 0.89                                        | -13.20                                                |
|                 | Cross C-1  |                 | -10.92                                       | -5.53                                        | -25.00                                      | 14.08                                    | 0.73                                        | -12.33                                                |
| Jones Ranch, TX |            |                 |                                              |                                              |                                             |                                          |                                             |                                                       |
|                 | CR13A      | Twin Mountains  | -4.72                                        | -4.37                                        | -24.70                                      | 19.98                                    | 0.61                                        | -12.03                                                |
|                 | CR13B      | (Aptian)        | -4.39                                        | -4.36                                        | -24.70                                      | 20.31                                    | 0.61                                        | -12.03                                                |
|                 | CR12A      |                 | -5.12                                        | -4.14                                        | -23.75                                      | 18.63                                    | 0.64                                        | -11.07                                                |
|                 | CR12B      |                 | -4.99                                        | -4.12                                        | -23.75                                      | 18.76                                    | 0.64                                        | -11.07                                                |
|                 | CR11A      |                 | -5.18                                        | -4.21                                        | -26.05                                      | 20.87                                    | 1.17                                        | -13.38                                                |
|                 | CR11B      |                 | -5.19                                        | -4.23                                        | -26.05                                      | 20.86                                    | 1.17                                        | -13.38                                                |
|                 | CR10A      |                 | -4.92                                        | -4.33                                        | -23.85                                      | 18.93                                    | 1.17                                        | -11.17                                                |
|                 | CR10B      |                 | -5.13                                        | -4.23                                        | -23.85                                      | 18.72                                    | 1.17                                        | -11.17                                                |
|                 | CR9A       |                 | -5.96                                        | -4.40                                        | -24.87                                      | 18.91                                    | 1.06                                        | -12.20                                                |
|                 | CR9B       |                 | -6.01                                        | -4.34                                        | -24.87                                      | 18.86                                    | 1.06                                        | -12.20                                                |
|                 | CR8A       |                 | -5.56                                        | -4.17                                        | -24.59                                      | 19.03                                    | 1.14                                        | -11.92                                                |
|                 | CR8B       |                 | -5.32                                        | -4.05                                        | -24.59                                      | 19.27                                    | 1.14                                        | -11.92                                                |
|                 | CR7A       |                 | -5.12                                        | -4.08                                        | -23.77                                      | 18.65                                    | 0.18                                        | -11.09                                                |
|                 | CR7B       |                 | -5.42                                        | -4.02                                        | -23.77                                      | 18.35                                    | 0.18                                        | -11.09                                                |
|                 | CR6B       |                 | -5.91                                        | -4.32                                        | -26.02                                      | 20.11                                    | 0.97                                        | -13.35                                                |
|                 | CR5A       |                 | -5.61                                        | -4.45                                        | -24.16                                      | 18.55                                    | 1.18                                        | -11.49                                                |
|                 | CR5B       |                 | -5.59                                        | -4.30                                        | -24.16                                      | 18.57                                    | 1.18                                        | -11.49                                                |

---

|                  |        |                |       |       |        |       |      |        |
|------------------|--------|----------------|-------|-------|--------|-------|------|--------|
|                  | CR4A   |                | -5.49 | -4.34 | -27.30 | 21.81 | 0.99 | -14.64 |
|                  | CR4B   |                | -5.64 | -4.22 | -27.30 | 21.66 | 0.99 | -14.64 |
|                  | CR3A   |                | -5.54 | -4.29 | -23.53 | 17.99 | 0.25 | -10.85 |
|                  | CR3B   |                | -5.70 | -4.25 | -23.53 | 17.83 | 0.25 | -10.85 |
|                  | CR2A   |                | -5.71 | -4.52 | -27.03 | 21.32 | 1.10 | -14.37 |
|                  | CR2A-R |                | -5.56 | -4.30 | -27.03 | 21.47 | 1.10 | -14.37 |
|                  | CR2B   |                | -5.67 | -4.87 | -27.03 | 21.36 | 1.10 | -14.37 |
|                  | CR1A   |                | -5.89 | -4.50 | -23.20 | 17.31 | 0.51 | -10.52 |
|                  | CR1A-R |                | -5.89 | -4.62 | -23.20 | 17.31 | 0.51 | -10.52 |
|                  | CR1B   |                | -5.67 | -4.48 | -23.20 | 17.53 | 0.51 | -10.52 |
| Proctor Lake, TX |        |                |       |       |        |       |      |        |
|                  | PL-8   | Twin Mountains | -7.84 | -5.78 | -21.08 | 13.24 | 1.02 | -8.39  |
|                  | PL-6   | (Aptian)       | -7.77 | -4.87 | -21.43 | 13.66 | 0.98 | -8.74  |
|                  | PL-3   |                | -8.00 | -4.74 | -21.39 | 13.39 | 1.05 | -8.70  |

---
